# Supplementary material for: Associations between Pro- and Anti-Inflammatory Gastro-Intestinal Microbiota, Diet, and Cognitive Functioning in Dutch Healthy Older Adults: The NU-AGE Study
Source: PubMed Central journal article supplement (PMC7697493; doi:10.3390/nu12113471), 2020-11-12
Supplement: nutrients-12-03471-s001.pdf [file nutrients-12-03471-s001.pdf]

Pro- and anti-inflammatory gastro-intestinal microbiota profiles are related to dietary patterns richer in animal- or plant-based foods, but not to cognitive functioning, in Dutch healthy older adults: the NU-AGE study

Annick P.M. van Soest, Gerben D.A. Hermes, Agnes A.M. Berendsen, Ondine van de Rest, Erwin G. Zoetendal, Susana Fuentes, Aurelia Santoro, Claudio Franceschi, Lisette C.P.G.M. de Groot, Willem M. de Vos

Online Supplementary Material

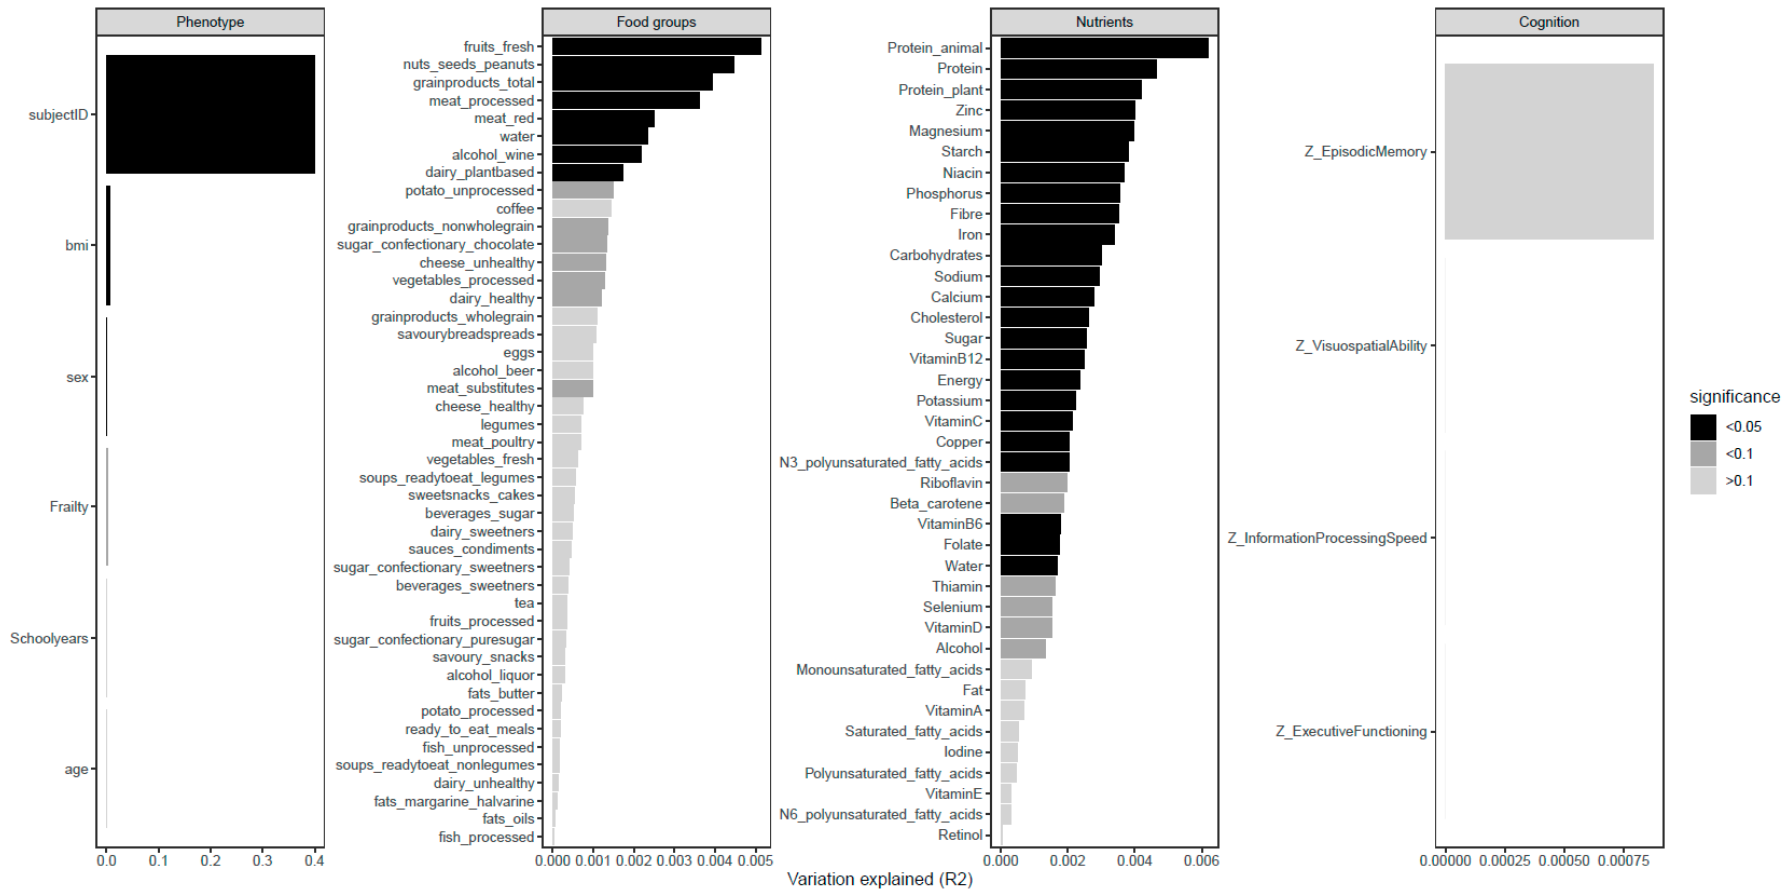

**Supplementary figure 1: Microbiota covariates.** Impact of the individual and all measured variables and on microbiota composition defined as percentage variation explained (R<sup>2</sup>) out of the total microbiota variation. A higher R<sup>2</sup> implies a stronger effect size.

Pro- and anti-inflammatory gastro-intestinal microbiota profiles are related to dietary patterns richer in animal- or plant-based foods, but not to cognitive functioning, in Dutch healthy older adults: the NU-AGE study

Annick P.M. van Soest, Gerben D.A. Hermes, Agnes A.M. Berendsen, Ondine van de Rest, Erwin G. Zoetendal, Susana Fuentes, Aurelia Santoro, Claudio Franceschi, Lisette C.P.G.M. de Groot, Willem M. de Vos

Online Supplementary Material

**Supplementary table 1.** Pearson correlation of alpha-diversity with fresh fruit categories. P-values are corrected for multiple testing using the Benjamini-Hochberg procedure.

|                    | <b>Richness</b> | <b>Corrected p-value</b> | <b>Shannon diversity</b> | <b>Corrected p-value</b> | <b>Inverse Simpson diversity</b> | <b>Corrected p-value</b> |
|--------------------|-----------------|--------------------------|--------------------------|--------------------------|----------------------------------|--------------------------|
| Total fresh fruits | 0.170           | <0.001                   | 0.157                    | <0.001                   | 0.105                            | 0.026                    |
| Citrus fruits      | 0.133           | 0.005                    | 0.105                    | 0.025                    | 0.086                            | 0.067                    |
| Apples and pears   | 0.098           | 0.037                    | 0.071                    | 0.129                    | 0.022                            | 0.640                    |
| Berries and grapes | 0.130           | 0.006                    | 0.115                    | 0.015                    | 0.102                            | 0.030                    |
| Banana             | -0.065          | 0.169                    | -0.048                   | 0.309                    | -0.092                           | 0.051                    |
| Stone fruits       | 0.062           | 0.192                    | 0.085                    | 0.071                    | 0.095                            | 0.044                    |
| Melon              | -0.010          | 0.827                    | -0.008                   | 0.867                    | -0.019                           | 0.692                    |
| Tropical fruits    | 0.086           | 0.067                    | 0.087                    | 0.063                    | 0.055                            | 0.246                    |
